# Supplementary material
Source: PubMed Central journal article supplement (PMC373258)
Supplement: nar_32_1_169__2.pdf [file nar_32_1_169__2.pdf]

### N terminal domain

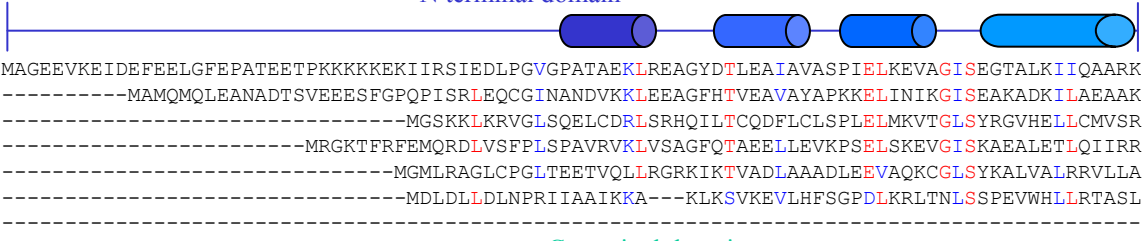

pfRad51 1 MAGEEVKEIDEFEELGFEPATEETPKKKKKKEI IRSIEDLPVGPATAEKLREAGYDTLEAIAVASPIELKEVAGISEGTALKIIQAARK  
 hsRad51 1 -----MAMQMQLLEANADTSVEEESFGQPQISRL EQCGINANDVKKLEEAGFHTVEAVAYAPKKEELINIKGISEAKADKILAEAAK  
 hsRad51b 1 -----MGSKKLRVGLSQELCDRLSRHQIILTCQDFLCLSPLELMKV TGLSYRGVHEL LCMVSR  
 hsRad51c 1 -----MRGKTFRFEMQRDLVSPFLSPAVRVKLV SAGFQTAEELLEV KPS ELSKEVGLSKAEALETLQIIRR  
 mmRad51d 1 -----MGMLRAGLCPGLTEETVQLLRGRKIKTVADLAAADLEEV AQKCGLSYKALVALRRVLLA  
 hsXrcc3 1 -----MDLDDL L D L N P R I I A A I K K A ---K L K S V K E V L H F S G P D L K R L T N L S S P E V W H L L R T A S L  
 hsXrcc2 1 -----

### Linker region

### C terminal domain

### Walker A

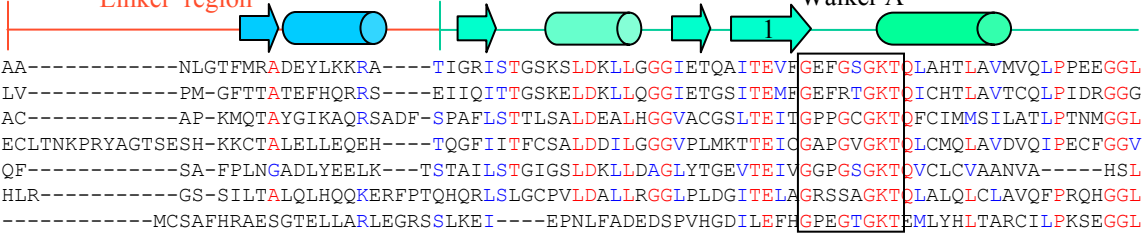

pfRad51 91 AA-----NLGTFMR ADEYLK KRA---TIGRISTGSKSLDKLLGGG IETQAITEVFGEFGSGKTQ LAHTLAVMVQLPPEEGGL  
 hsRad51 81 LV-----PM-GFTTATEFHQRRS---EIIQIT TGSKELDKLLQGGIETGSI TEFMEGEFRTGKTQ ICHTLAVTCQLPIDRGGG  
 hsRad51b 59 AC-----AP-KMQTAYGIKAQRSADF-SPAF LST T L S A L D E A L H G G V A C G S L T E I T G P P G C G K T Q F C I M S I L A T L P T N M G G L  
 hsRad51c 67 ECLTNKPRYAGTSESH-KKCTALELLELQEH---TQGF I I T F C S A L D D I L G G V P L M K T T E I C G A P G V G K T Q L C M Q L A V D V Q I P E C F G G V  
 mmRad51d 60 QF-----SA-FPLNGADLYEELK---TSTAILSTGIGSLDKLLDAGLYTGEVTEIVGGPGSGKTQVCLCVAANVA-----HSL  
 hsXrcc3 56 HLR-----GS-SILTA L Q L H Q Q K E R F P T Q H Q R L S L G C P V L D A L L R G G L P L D G I T E L A G R S S A G K T Q L A L Q L C L A V Q F P R Q H G G L  
 hsXrcc2 1 -----MCSAFHRAESGTELLARLEGRS S L K E I ---E P N L F A D E D S P V H G D I L E F F G P E G T G K T Q E M L Y H L T A R C I L P K S E G G L

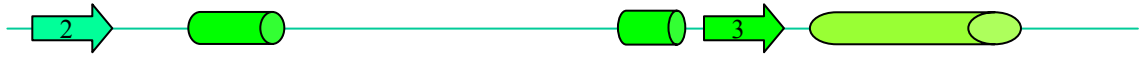

pfRad51 165 NGSVIWIDTENTFRPERIREIAQNR-----GLDPDEV L K H I Y V A R A F N S N H Q M L L V Q Q A E D K I K E L L N T D R - P V  
 hsRad51 154 EGKAMYIDTEGTFRPERLLVAERY-----GLSGSDVLDN V A Y A R A F N T D H Q T Q L L Y Q A S A M M V E S -----R Y  
 hsRad51b 135 EGAVVYIDTESAFSAERLVEIAESRFRPYFN-----TEEKLLL---TSSKVHLYRELTCDEVLQRIESLEEEIISK-----G I  
 hsRad51c 152 AGEAVFIDTEGSFMVDRVVDLATA CI Q H L Q L I A E K H K G E E H R K A L E D F T L D N I L S H I Y Y F R C R D Y T E L L A Q V Y L P D F L S E H S -----K V  
 mmRad51d 129 QQNVLYVDSNGGMTASRLQLLQAR-----TQDEEKQASALQR I Q V V R S F D I F R M L D M L Q D L R G T I A Q Q E A T S S G A V  
 hsXrcc3 134 EAGAVYICTEDAFPHKRLLQQLMAQQPRLRTD-----VPGELLQKLRFGSQIFIEHVADVDTLLECVNKKVPVLLSRG-----M A  
 hsXrcc2 75 EVEVLFIDTDYHFDMLRLVITILEHR-----LSQSSEEI IKYCLGRFFLVYVCSSTHLL L L T L Y S L E S M F C S -----H P S L

### Walker B

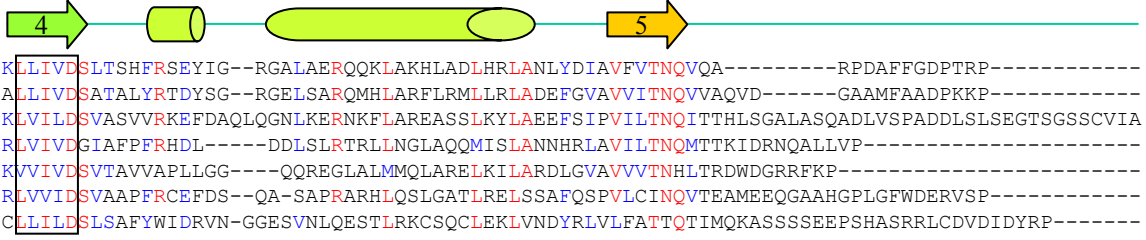

pfRad51 233 KLLIVDSL T S H F R S E Y I G --R G A L A E R Q Q K L A K H L A D L H R L A N L Y D I A V F V T N Q V Q A -----R P D A F F G D P T R P -----  
 hsRad51 217 ALLIVDSATALYRTDYSG--RGEL SAR Q M H L A R F L R M L L R L A D E F G V A V V I T N Q V V A Q V D -----G A A M F A A D P K K P -----  
 hsRad51b 205 KLVILDSVASVVRKEFD A Q L Q G N L K E R N K F L A R E A S S L K Y L A E E F S I P V I L T N Q I T T H L S G A L A S Q A D L V S P A D D L S L S E G T S G S S C V I A  
 hsRad51c 237 RLVI D G I A F P F R H D L -----D D L S L R T R L L N G L A Q Q M I S L A N N H R L A V I L T N Q M T T K I D R N Q A L L V P -----  
 mmRad51d 201 KVVIVDSVTAVVAPLLGG---QQREGI AL M Q L A R E L K I L A R D L G V A V V V T N H L T R D W D G R R F K P -----  
 hsXrcc3 208 RLVI V D S V A A P F R C E F D S --Q A -S A P R A R H L Q S L G A T L R E L S S A F Q S P V L C I N Q V T E A M E E Q G A A H G P L G F W D E R V S P -----  
 hsXrcc2 144 C L L I D S L S A F Y W I D R V N -G G E S V N L Q E S T L R K C S Q C L E K L V N D Y R L V L F A T T Q T I M Q K A S S S E E P S H A S R R L C D V D I D Y R P -----

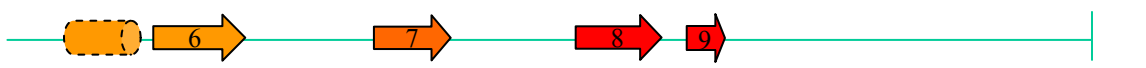

pfRad51 300 IGGHILAHSATLRVYLRK GK-----GGKRIARLIDAPHLPE-GEAVFSITEKGI ED-----  
 hsRad51 287 IGGNIIAHASTRLYLKGR-----GETRICQIYDSPCLPE-AEAMFAINADGVDAKD-----  
 hsRad51b 295 ALGNTWSHSVNTRLILQYLD-----SERRQILIAKSP L A P F -T S F V Y T I K E E G L V L Q A Y G N S -----  
 hsRad51c 300 ALGESWGHAAITRLIFHWDR-----KQRLATLYKSPSQKE-CTVLFQIKPQGRDVTVTSACSLQTEGSLSTRKRSRDP E E E L  
 mmRad51d 263 ALGRSWSFVPSSTRILLDVTEGAGTL-GSSQRTVCLTKSPROPTGLQEMIDIGTLGTEEQSPQLPGKQHTHCLGS-----  
 hsXrcc3 283 ALGITWANQLLVRLLADRLREEEAAALGCPARTLRVLSAPHLPP-SSCSYTISAEGVRGTPGTQSH-----  
 hsXrcc2 226 YLCKAWQQLVKHRMFFSKQD---DSQSSNQFSLVSRCLKSNSLKKHFFIIGESGV E F C -----
